# Supplementary material for: Low Pneumococcal Vaccination among Patients with Psoriasis in Germany: Results from Vac-Pso
Source: MDPI journal article supplement (doi:10.3390/vaccines10071005), 2022-06-23
Supplement: s1 [file s1]

## Supplementary Material

**Table S1.** Indication for pneumococcal vaccination according to the STIKO

| Indication                                                                                                                                                                                                                                                                                                                                                                                                                                                                                                                                                                    | Vaccination schedule                                                                                                                                                                                                                                                                                                                                                                                                             |
|-------------------------------------------------------------------------------------------------------------------------------------------------------------------------------------------------------------------------------------------------------------------------------------------------------------------------------------------------------------------------------------------------------------------------------------------------------------------------------------------------------------------------------------------------------------------------------|----------------------------------------------------------------------------------------------------------------------------------------------------------------------------------------------------------------------------------------------------------------------------------------------------------------------------------------------------------------------------------------------------------------------------------|
| Healthy adults $\geq 60$ years of age                                                                                                                                                                                                                                                                                                                                                                                                                                                                                                                                         | PPSV23, booster vaccinations (PPSV23) at intervals of 6 years may be considered                                                                                                                                                                                                                                                                                                                                                  |
| <b>Chronic diseases</b> (individuals $\geq 16$ years of age) <ul style="list-style-type: none"> <li>- Chronic cardiovascular diseases or diseases of respiratory system</li> <li>- Metabolic diseases</li> <li>- Neurological diseases</li> </ul>                                                                                                                                                                                                                                                                                                                             | PPSV23, booster vaccination (PPSV23) at intervals of 6 years recommended                                                                                                                                                                                                                                                                                                                                                         |
| Congenital or acquired immunodeficiency (individuals $\geq 2$ years of age) <ul style="list-style-type: none"> <li>- Deficiency or impaired function of T-cells, B-cells, antibodies, complement system, or myeloid cells</li> <li>- (Functional) hyposplenia, asplenia</li> <li>- Neoplastic diseases</li> <li>- HIV infection</li> <li>- Bone marrow transplantation</li> <li>- <b>Immunosuppressive therapy</b> (e.g. due to organ transplantation or autoimmune disease)</li> <li>- Chronic kidney failure, nephrotic syndrome, or chronic liver insufficiency</li> </ul> | <p>Sequential vaccination with PCV13 and PPSV23 after 6-12 months, booster vaccination (PPSV23) at intervals of 6 years recommended</p> <p>In individuals with immunosuppressive therapy, vaccination should be performed before treatment initiation</p> <p>In patients who had received PPSV23 vaccination prior to immunosuppressive therapy, PCV13 vaccination is recommended after at least one year after PPSV23 [15].</p> |
| Diseases and implants with risk of meningitis (individuals $\geq 2$ years of age) <ul style="list-style-type: none"> <li>- Cerebrospinal fluid fistula</li> <li>- Cochlear implant</li> </ul>                                                                                                                                                                                                                                                                                                                                                                                 | PPSV23, booster vaccination (PPSV23) at intervals of 6 years recommended                                                                                                                                                                                                                                                                                                                                                         |

The table shows indications for pneumococcal vaccination and associated vaccination schedules according to the STIKO of RKI [14]. Indications which commonly apply to patients with psoriasis and atopic dermatitis (i.e., age, common comorbid diseases, and immunosuppressive therapy) are indicated in bold. STIKO: permanent vaccination commission of the Robert Koch Institute; HIV: human immunodeficiency virus; RKI: Robert Koch Institute. PPSV23: Pneumovax®; MSD Sharp & Dohme GmbH, Munich, Germany. PCV13: Prevenar 13®; Pfizer Pharma GmbH, Berlin, Germany.

**Table S2.** Disease characteristics

| Characteristic                              | Psoriasis, n (%) <sup>a</sup> | Atopic dermatitis, n (%) <sup>a</sup> |
|---------------------------------------------|-------------------------------|---------------------------------------|
| <b>Disease activity and quality of life</b> |                               |                                       |
| PASI, median (IQR)                          | 1.8 (0.2 - 4.0)               | -                                     |
| EASI, median (IQR)                          | -                             | 10.6 (2.7-17.2)                       |
| DLQI, median (IQR)                          | 3.0 (0.0 - 9.0)               | 12.0 (5.0 - 18.0)                     |
| <b>Current therapy</b>                      |                               |                                       |
| Phototherapy                                | 1 (0.3)                       | 9 (9.2)                               |
| Systemic therapy                            | 301 (92.0)                    | 39 (39.8)                             |
| Apremilast                                  | 15 (4.6)                      | -                                     |
| Cyclosporine                                | 0 (0.0)                       | 8 (8.2)                               |
| Fumaric acid ester                          | 17 (5.2)                      | -                                     |
| Leflunomide                                 | 1 (0.3)                       | -                                     |
| Methotrexate                                | 17 (5.2)                      | 1 (1.0)                               |
| Tofacitinib                                 | 6 (1.8)                       | -                                     |
| Retinoids                                   | 3 (0.9)                       | 1 (1.0)                               |
| Biologics <sup>b</sup>                      | 242 (74.0)                    | 29 (29.6)                             |
| TNF- $\alpha$ antagonists                   | 65 (19.9)                     | -                                     |
| IL-(12)/23 antagonists                      | 114 (34.9)                    | -                                     |
| IL-17(R) antagonists                        | 62 (19.0)                     | -                                     |
| Dupilumab                                   | -                             | 29 (29.6)                             |
| <b>Former therapy</b>                       |                               |                                       |
| Phototherapy                                | 152 (46.5)                    | 48 (49.0)                             |
| Systemic therapy                            | 287 (87.8)                    | 42 (42.9)                             |
| Apremilast                                  | 31 (9.5)                      | -                                     |
| Corticosteroids                             | NR                            | 24 (24.5)                             |
| Cyclosporine                                | 43 (13.1)                     | 20 (20.4)                             |
| Fumaric acid ester                          | 164 (50.2)                    | -                                     |
| Leflunomide                                 | 15 (4.6)                      | -                                     |
| Methotrexate                                | 175 (53.5)                    | 5 (5.1)                               |
| Sulfasalazine                               | 12 (3.7)                      | -                                     |
| JAK-i <sup>c</sup>                          | 2 (0.6)                       | -                                     |
| Retinoids                                   | 50 (15.3)                     | 5 (5.1)                               |
| Biologics                                   | 181 (55.4)                    | 6 (6.1)                               |
| TNF- $\alpha$ antagonists                   | 130 (39.8)                    | -                                     |
| IL-12/23 antagonists                        | 79 (24.2)                     | -                                     |
| IL-17(R) antagonists                        | 55 (16.8)                     | -                                     |
| Dupilumab                                   | -                             | 6 (6.1)                               |
| Other therapy <sup>d</sup>                  | 19 (5.8)                      | 6 (6.1)                               |
| Number of previous therapies, mean (SD)     | 3.7 (2.6)                     | 3.6 (1.9)                             |

<sup>a</sup> If not indicated otherwise, the number and percentage are depicted. <sup>b</sup> Other biologicals in the PsO group comprised abatacept (n=1).

<sup>c</sup> Janus kinase inhibitors (JAK-i) comprised tofacitinib (n=1) and baricitinib (n=1). <sup>d</sup> Other therapy in the PsO group comprised efalizumab (n=12), oncept (n=2), mycophenolatemofetil (n=1), alefacept (n=2), abatacept (n=1), anakinra (n=1), and rituximab (n=1). Other therapy in the AD group comprised autohaemotherapy (n=1), nemolizumab (n=1), and azathioprin (n=1). PASI: Psoriasis Area and Severity Index; EASI: Eczema Area and Severity Index; DLQI: Dermatology Life Quality Index; IQR: interquartile range; NA: not applicable.

**Table S3.** Subgroup analysis with respect to pneumococcal vaccination status

| Characteristic                            | Psoriasis                      |                                  |                      | Atopic dermatitis              |                                  |              |
|-------------------------------------------|--------------------------------|----------------------------------|----------------------|--------------------------------|----------------------------------|--------------|
|                                           | Vaccinated, n (%) <sup>a</sup> | Unvaccinated, n (%) <sup>a</sup> | p-value <sup>b</sup> | Vaccinated, n (%) <sup>a</sup> | Unvaccinated, n (%) <sup>a</sup> | p-value      |
| Cohort size                               | 47                             | 280                              |                      | 10                             | 88                               |              |
| Female gender                             | 25 (53.2)                      | 112 (40.0)                       | 0.110                | 4 (40.0)                       | 38 (43.2)                        | 1.000        |
| Age, years, mean (SD)                     | <b>62.1 (10.4)</b>             | <b>51.9 (13.8)</b>               | <b>&lt;0.001</b>     | 58.1 (22.3)                    | 42.8 (17.5)                      | 0.061        |
| Age at onset of disease, years, mean (SD) | <b>34.3 (16.8)</b>             | <b>27.9 (16.7)</b>               | <b>0.019</b>         | 28.1 (36.6)                    | 16.3 (23.4)                      | 0.340        |
| Disease duration years, mean (SD)         | 27.8 (17.8)                    | 24.0 (15.0)                      | 0.172                | 30.0 (29.6)                    | 26.4 (16.4)                      | 0.717        |
| Family history of PsO                     | 18 (38.3)                      | 145 (51.8)                       | 0.114                | 3 (30.0)                       | 18 (20.5)                        | 0.443        |
| Family history of AD                      | 8 (17.0)                       | 42 (15.0)                        | 0.667                | 3 (30.0)                       | 43 (48.9)                        | 0.327        |
| <b>Occupational status</b>                |                                |                                  |                      |                                |                                  |              |
| Working full-time                         | <b>8 (17.0)</b>                | <b>130 (46.4)</b>                | <b>&lt;0.001</b>     | 2 (20.0)                       | 34 (38.6)                        | 0.317        |
| Working part-time                         | 5 (10.6)                       | 33 (11.8)                        | 1.000                | 3 (30.0)                       | 15 (17.0)                        | 0.385        |
| <b>Comorbidity</b>                        |                                |                                  |                      |                                |                                  |              |
| PsA                                       | <b>37 (78.7)</b>               | <b>150 (53.6)</b>                | <b>0.001</b>         | -                              | -                                | -            |
| Age at onset of PsA, years, mean (SD)     | <b>51.2 (11.9)</b>             | <b>44.8 (13.8)</b>               | <b>0.006</b>         | -                              | -                                |              |
| BMI (mean, SD)                            | 31.3 (7.9)                     | 29.7 (6.4)                       | 0.196                | 25.7 (4.8)                     | 26.0 (5.6)                       | 0.833        |
| Obesity (BMI ≥ 30)                        | 26 (55.3)                      | 116 (41.4)                       | 0.082                | 1 (10.0)                       | 14 (15.9)                        | 1.000        |
| Arterial hypertension                     | <b>31 (66.0)</b>               | <b>115 (41.1)</b>                | <b>0.002</b>         | 5 (50.0)                       | 25 (28.4)                        | 0.275        |
| Cardiovascular disease <sup>c</sup>       | 10 (21.3)                      | 46 (16.4)                        | 0.461                | 2 (20.0)                       | 10 (11.4)                        | 0.353        |
| Dyslipidemia                              | 15 (31.9)                      | 71 (25.4)                        | 0.372                | 1 (10.0)                       | 10 (11.4)                        | 1.000        |
| Hepatic steatosis                         | 20 (42.6)                      | 86 (30.7)                        | 0.130                | 1 (10.0)                       | 6 (6.8)                          | 0.541        |
| Hepatic cirrhosis                         | 3 (6.4)                        | 4 (1.4)                          | 0.064                | 0 (0.0)                        | 0 (0.0)                          | -            |
| Other hepatic diseases <sup>d</sup>       | 3 (6.4)                        | 11 (3.9)                         | 0.434                | 0 (0.0)                        | 2 (2.3)                          | 1.000        |
| Diabetes mellitus                         | 9 (19.1)                       | 31 (11.1)                        | 0.146                | 0 (0.0)                        | 4 (4.5)                          | 1.000        |
| Chronic kidney disease <sup>e</sup>       | 3 (6.5)                        | 17 (6.3)                         | 1.000                | 0 (0.0)                        | 4 (6.2)                          | 1.000        |
| COPD / emphysema                          | <b>9 (19.1)</b>                | <b>22 (7.9)</b>                  | <b>0.027</b>         | 2 (20.0)                       | 5 (5.7)                          | 0.149        |
| Asthma                                    | 5 (10.6)                       | 24 (8.6)                         | 0.586                | <b>8 (80.0)</b>                | <b>33 (37.5)</b>                 | <b>0.016</b> |
| Allergic contact dermatitis               | 3 (6.4)                        | 25 (8.9)                         | 0.776                | 3 (30.0)                       | 35 (39.8)                        | 0.736        |
| Allergic rhinoconjunctivitis              | 7 (14.9)                       | 45 (16.1)                        | 1.000                | 5 (50.0)                       | 56 (63.6)                        | 0.496        |
| Food allergies                            | 2 (4.3)                        | 25 (8.9)                         | 0.396                | 5 (50.0)                       | 42 (47.7)                        | 1.000        |
| Depression                                | <b>16 (34.0)</b>               | <b>54 (19.3)</b>                 | <b>0.034</b>         | 3 (30.0)                       | 13 (14.8)                        | 0.207        |
| Neoplastic diseases <sup>f</sup>          | 2 (4.3)                        | 9 (3.2)                          | 0.663                | 1 (10.0)                       | 3 (3.4)                          | 0.355        |
| <b>Smoking status</b>                     |                                |                                  |                      |                                |                                  |              |
| Current smoker                            | 15 (31.9)                      | 97 (34.6)                        | 0.868                | 2 (20.0)                       | 29 (33.0)                        | 0.497        |
| Ex-smoker                                 | 26 (55.3)                      | 118 (42.1)                       | 0.112                | 4 (40.0)                       | 23 (26.1)                        | 0.456        |
| Never smoker                              | 6 (12.8)                       | 65 (23.2)                        | 0.128                | 4 (40.0)                       | 36 (40.9)                        | 1.000        |
| <b>Previous infectious diseases</b>       |                                |                                  |                      |                                |                                  |              |
| Pneumonia                                 | <b>14 (29.8)</b>               | <b>42 (15.0)</b>                 | <b>0.035</b>         | 3 (30.0)                       | 15 (17.0)                        | 0.382        |
| Years since pneumonia, mean (SD)          | 14.0 (16.2)                    | 16.2 (15.3)                      | 0.658                | 11.3 (8.1)                     | 15.5 (8.6)                       | 0.481        |

|                                                |                  |                  |              |                 |                   |              |
|------------------------------------------------|------------------|------------------|--------------|-----------------|-------------------|--------------|
| Hospitalization due to pneumonia <sup>§</sup>  | 4 (28.6%)        | 10 (23.8%)       | 0.732        | 1 (33.3%)       | 6 (40.0%)         | 1.000        |
| Bronchitis                                     | 17 (36.2)        | 77 (27.5)        | 0.290        | 4 (40.0)        | 25 (28.4)         | 0.737        |
| Years since bronchitis                         | 6.2 (6.9)        | 8.0 (10.4)       | 0.373        | 9.3 (11.3)      | 5.6 (8.5)         | 0.575        |
| Hospitalization due to bronchitis <sup>§</sup> | 0 (0.0)          | 8 (10.4)         | 0.342        | 1 (25.0)        | 0 (0.0)           | 0.143        |
| Herpes zoster                                  | 12 (25.5)        | 44 (15.7)        | 0.146        | 3 (30.0)        | 10 (11.4)         | 0.143        |
| Years since Herpes zoster, mean (SD)           | 11.8 (13.4)      | 15.7 (13.4)      | 0.378        | 23.0 (16.1)     | 10.9 (11.4)       | 0.322        |
| (Post)herpetic neuralgia <sup>§</sup>          | 10 (83.3)        | 33 (75.0)        | 1.000        | <b>1 (33.3)</b> | <b>10 (100.0)</b> | <b>0.039</b> |
| <b>Disease activity</b>                        |                  |                  |              |                 |                   |              |
| PASI median (IQR)                              | <b>2.1 (3.4)</b> | <b>1.6 (3.9)</b> | <b>0.024</b> | -               | -                 | -            |
| EASI median (IQR)                              | -                | -                | -            | 7.0 (11.0)      | 10.8 (14.2)       | 0.054        |
| DLQI median (IQR)                              | 3.0 (7.0)        | 3.0 (9.0)        | 0.771        | 6.0 (6.3)       | 13.0 (13.0)       | 0.112        |

<sup>a</sup> If not indicated otherwise, the number and percentage are depicted. <sup>b</sup> Differences comparing the subgroups of vaccinated and not vaccinated patients separately for PsO and AD were calculated with Pearson's  $\chi^2$ -test for discrete-valued variables and student's t-test and Mann-Whitney u test for normally and not-normally distributed continuous variables, respectively. Significant results are printed in bold. <sup>c</sup> Cardiovascular diseases comprised heart attack, stroke, coronary artery disease, arterial occlusive disease, cardiac insufficiency. <sup>d</sup> Other hepatic diseases comprised focal nodular hyperplasia (n=1), Gilbert's syndrome (n=1), hemangioma (n=2), primary biliary cholangitis (n=1), hepatitis B (n=7), hepatitis C (n=2), and healed hepatitis E (n=2). <sup>e</sup> Chronic kidney disease was assumed if indicated in the questionnaire and, if not indicated in the questionnaire, according to serum creatinine levels using the CKD-EPI equation 2009 [38]. <sup>f</sup> Neoplastic diseases comprised lymphoma (n=4), breast cancer (n=4), cervix carcinoma (n=2), melanoma (n=2), renal cell carcinoma (n=1), colon carcinoma (n=1) and glioblastoma (n=1). <sup>§</sup> The percentage refers to the number of patients with the respective infectious disease (pneumonia, bronchitis, and herpes zoster, respectively).

**Table S4.** Regression analysis predicting pneumococcal vaccination in PsO patients

| Variable                               | Coefficient (SE)      | p-value          |
|----------------------------------------|-----------------------|------------------|
| <b>Age ≥ 60 years</b>                  | <b>0.004 (0.001)</b>  | <b>&lt;0.001</b> |
| Female <sup>a</sup>                    | 0.029 (0.042)         | 0.482            |
| <b>Working full-time<sup>b</sup></b>   | <b>-0.079 (0.036)</b> | <b>0.027</b>     |
| <b>PsA</b>                             | <b>0.091 (0.037)</b>  | <b>0.014</b>     |
| Further comorbidity                    | 0.021 (0.021)         | 0.332            |
| History of pneumonia or bronchitis     | 0.017 (0.040)         | 0.680            |
| Immunosuppressive therapy <sup>c</sup> | 0.043 (0.048)         | 0.365            |
| <b>Constant</b>                        | <b>-0.189 (0.084)</b> | <b>0.025</b>     |

The dependent variable for the regression analysis was the probability of a pneumococcal vaccination. Independent variables included age, gender, occupational status, PsA, at least one further comorbidity (i.e., asthma, COPD, cardiovascular disease, hepatic cirrhosis, diabetes mellitus, obesity, chronic kidney disease, and neoplastic disease), a history of bronchitis and pneumonia, and immunosuppressive therapy. Significant predictors are printed in bold. <sup>a</sup> The reference category to female was male. <sup>b</sup> The reference category of working full-time was any other occupational status. <sup>c</sup> Just current immunomodulatory or immunosuppressive systemic therapy administered for PsO and PsA were taken into consideration (i.e., fumaric acid ester, methotrexate, tofacitinib, cyclosporine, leflunomide, and biologicals). The model was adjusted for the center of recruitment (not significant). SE: standard error.
